# Supplementary material for: Electroconvulsive therapy generates a postictal wave of spreading depolarization in mice and humans
Source: PubMed Central journal article supplement — bioRxiv. 2025 Feb 21:2024.10.31.621357. Originally published 2024 Nov 1. Preprint. [Version 2] doi: 10.1101/2024.10.31.621357 (PMC11565954; doi:10.1101/2024.10.31.621357), 2025-02-21
Supplement: media-2.pdf [file media-2.pdf]

## 1 **Supplementary Discussion**

2 All data (**Extended Data Table 2**) were subjected to rigorous quality control, and as a  
3 result, n=15 recordings were excluded (see **Supplementary Methods**). Note, in many of  
4 the recordings that were excluded for poor signal-to-noise, post-ictal CSD waves were  
5 still grossly evident due to their large magnitude. Several variables can potentially lead to  
6 poor signal quality and/or introduce confounds in the absolute recovered blood flow index  
7 and tissue oxygenation. Motion artifacts can be introduced acutely during electrical  
8 stimulation from contraction of the frontalis muscle under the probe, as well as from  
9 movement during seizure or repositioning of the head during ventilation. In addition, the  
10 electrical stimulus delivery (0.5 – 8 seconds in duration) may induce some degree of  
11 thermal heating, though this would be unlikely to persist or fluctuate on the timescale of  
12 minutes during subsequent post-ictal CSDs. Other confounds known to impact the  
13 absolute hemodynamic metrics include regional variation in tissue optical properties,  
14 vascular microanatomy, scalp/skull thickness, head curvature, and hematocrit. *Relative*  
15 changes in the cerebral blood flow index and tissue oxygenation, however, are much  
16 more robust to these confounds. Accordingly, we standardized analysis across patient  
17 recordings by reporting percent change relative to that patient's baseline blood flow index,  
18 relative difference from the patient's baseline cerebral oxygen saturation.

19

20 Our device uses combined superficial and deep detectors to mitigate against the  
21 overlapping effects of skin/skull and brain hemodynamics in the optical path. Somewhat  
22 surprisingly, we found that post-ictal surges in blood flow seen by deep cerebral DCS  
23 detectors (long source-detector pairs) were mirrored by similar waves in superficial

24 detectors (short source-detector pairs). The relative amplitude of the superficial versus  
25 deep post-ictal waves was variable, which we suspect could reflect individual anatomic  
26 variations sampled by the tissue light pathlength distribution associated with each probe  
27 placement. One possible explanation for this shared signal in brain and scalp/skull is that  
28 a massive increase in cerebral blood flow during CSD might exceed vascular  
29 autoregulation and spill over collateral flow vessels connecting brain to scalp and skull  
30 (e.g., anastomoses from the internal carotid to the supratrochlear or supraorbital arteries);  
31 such an effect could potentially cause blood flow changes in superficial detectors. Further  
32 studies are required to fully discern the interplay of extra-cerebral and cerebral  
33 hemodynamics, which may vary depending on probe placement relative to regional  
34 vascular anatomy.

35

36 In addition to our experimental results, we described a brief case series (obtained  
37 independently at a separate institution) that were consistent with the findings of post-ictal  
38 CSD in ECT in both rodent electrophysiology and human brain hemodynamics. In a  
39 mouse, post-ictal CSD was observed using a different ECT stimulation paradigm  
40 (auricular electrodes), anesthetic agent (isoflurane), and recording modality (glass pipette  
41 electrocorticography probe). Seizure induction with ear clip electrodes was notably  
42 inconsistent and required relatively higher stimulus intensities. Brief pulse-trains (0.2 s,  
43 60 Hz) induced seizure in 0/3 trials at 10 mA, 0/1 at 30 mA, 4/12 at 50 mA, 2/3 at 70 mA,  
44 11/17 at 80 mA, 8/15 at 90 mA, and 5/7 at 99 mA. In every case, ECT-induced seizures  
45 were bilateral, lasting 10-25 seconds. In one case, an ECT-induced bilateral seizure was  
46 followed by unilateral SD, confirmed by direct current electrocorticography (**Extended**

47 **Data Figure 2).** This finding subsequently inspired a human pilot test using a clinical  
48 continuous wave NIRS device that reported cerebral oxygen saturation during ECT  
49 **(Extended Data Figure 6)**, which likewise demonstrated a post-ictal, minutes-long surge  
50 in brain oxygen saturation, predominantly in the right hemisphere in two cases of right  
51 unilateral ECT, and symmetrically in a case of bilateral ECT.

52

53 We further attempted (and ultimately failed) to non-invasively measure the electrical  
54 component of CSD waves using state-of-the-art direct current electroencephalography  
55 (DC-EEG, ANT Neuro) with both a conventional saline net (n=3) and a custom adaptor  
56 with Ag/AgCl electrodes (n=2). We observed slow DC potential drifts during ECT that  
57 might be consistent with CSD, but without routine high-pass filters, the low frequency  
58 EEG signals were highly sensitive to noise and motion artifacts (e.g., from bag masking  
59 ventilatory support). Slow potential drift artifacts could also be generated by small  
60 movements in the wires connected to the EEG amplifier (data not shown). Thus, we find  
61 that non-invasive DC-EEG is not sufficient to conclusively detect CSD, consistent with  
62 prior reports<sup>1,2</sup>.

63

64

65

66

67

68

69

70

## 71 **Supplemental Methods**

### 72 *Diffuse Optical Monitoring Instrumentation and Signal Processing*

73 The diffuse optical instrumentation employed for this study is a customized, combined  
74 frequency domain diffuse optical spectroscopy (FD-DOS) and diffuse correlation  
75 spectroscopy (DCS) system (MetaOx, ISS Medical, USA)<sup>3,4</sup>. The FD-DOS system  
76 contains diode lasers emitting at four wavelengths (682, 760, 805, and 830nm); the lasers  
77 are amplitude modulated at 110MHz. Each of these wavelengths is available at four  
78 output ports that operate in a time-multiplexed manner, such that one wavelength is  
79 emitting at a time. For detection of the diffusely reflected light, the system contains four  
80 photomultiplier tubes. The instrument is constructed in a heterodyne architecture such  
81 that the radiofrequency modulated intensity detected by the photomultiplier tubes is down-  
82 modulated and compared to a reference signal to recover diffuse light wave amplitude  
83 and phase at a rate of 50Hz. The DCS system contains two long coherence length laser  
84 sources (DL850-100S, CrystaLaser, USA) operating at 852nm; the laser outputs are  
85 attenuated to ~38mW to abide by American National Standards Institute defined limits.  
86 For light detection, the DCS system contains two fast single photon avalanche diode  
87 (SPAD) arrays comprised of four detectors each (SPCM-AQ4C, Excelitas, CA)<sup>5</sup>. The  
88 SPAD array outputs a logic pulse upon detecting a photon that is relayed to a real-time  
89 software autocorrelator to recover the normalized intensity autocorrelation function  
90 ( $g_2(\tau)$ ) at a rate of 50Hz. The normalized intensity autocorrelation function is used to  
91 recover a blood flow index<sup>6</sup>.

92

93 To perform bilateral cerebral monitoring, two source and two detector ports of the FD-  
94 DOS system are dedicated to each hemisphere; for DCS, each hemisphere uses one  
95 source and four SPAD detectors. Two identical probes consisting of optical fibers bonded  
96 to 90-degree prisms embedded in flexible urethane rubber enable a low-profile, side-firing  
97 orientation that can easily adapt to the natural curvature of the skull. Each of the probes  
98 contain well-controlled inter-optode source-detector distances that enable optical  
99 sampling of tissues at varying depths from the surface. For FD-DOS, these inter-optode  
100 distances are 1.5, 2, 2.5, and 3cm, and for DCS, they are 1 and 2.5cm. These distances  
101 are selected to balance the increased cerebral sensitivity, expected from larger  
102 separations, with sufficient signal-to-noise ratio of the detected light<sup>7</sup>. To enhance the  
103 achievable signal-to-noise ratio for DCS, the optical fibers of three SPAD detectors are  
104 co-located at the 2.5cm separation to enable signal averaging; only one SPAD is  
105 dedicated to the 1cm position. The probes are placed at F3 and F4 on the subject's  
106 forehead, positioned laterally to avoid the frontal sinuses, and below the hairline to avoid  
107 hair follicle attenuation of the optical signal<sup>8</sup>.

108

109 Optical properties (absorption and reduced scattering coefficients) and blood flow are  
110 extracted via non-linear regression of the measured data using the homogeneous semi-  
111 infinite solutions of the frequency domain-photon diffusion equation and the correlation  
112 diffusion equation, i.e., for FD-DOS and DCS, respectively<sup>6</sup>. Data from both modalities  
113 were down sampled from their original 50Hz collection rate to 0.2Hz to improve  
114 measurement signal-to-noise ratio. To further improve accuracy of FD-DOS fitting, data  
115 from all inter-optode distances are combined to recover a single set of absorption and

116 reduced scattering coefficients at each wavelength<sup>9</sup>. The absorption coefficients from  
117 these fits are then used to recover oxy/deoxy-hemoglobin concentrations using the Beer-  
118 Lambert law, while assuming a water fraction of 75%<sup>6</sup>. These concentrations are then  
119 used to recover cerebral oxygenation by taking the ratio of oxy-hemoglobin to the sum of  
120 oxy and deoxy-hemoglobin concentrations. For DCS, the signals at 1 and 2.5cm are fit  
121 independently to preserve the sensitivity to superficial and deep blood flow; the  
122 concurrent FD-DOS measurements of tissue absorption and reduced scattering were  
123 inputs in the DCS fits. The blood flow indices recovered from the fits are approximately  
124 proportional to the average tissue blood flows sampled by the detected light at the 1 and  
125 2.5 cm inter-optode distances. The blood flow index time-series for the 1 and 2.5 cm  
126 distances are then divided by their median value in the 30 seconds period prior to  
127 stimulation to recover relative blood flow (rBF). Note, probes were calibrated using a  
128 silicon phantom with known optical properties before and after each recording to  
129 determine FD-DOS light coupling coefficients; specifically, the mean values of phase and  
130 amplitude recovered from the silicone calibration block were used to recover the optical  
131 coupling coefficients. These coupling coefficients are the multiplicative offset between the  
132 measured and theoretically expected amplitude, and the additive offset between the  
133 measured and theoretically expected phase.

134

135 Determination of whether FD-DOS data provided sufficient quality was made by fitting the  
136 multi-distance data to the linearized solutions of the semi-infinite frequency domain-  
137 photon diffusion equation<sup>6</sup>. The  $R^2$  of the linear fits at each timepoint and each FD-DOS  
138 wavelength were recorded for both the amplitude and phase data. If the temporal mean

139 of  $R^2$  for the amplitude and/or phase was less than 0.95 for two or more light wavelengths,  
140 then the entire subject was excluded from analysis. If this occurred for only one  
141 wavelength, the subject was included, but the subject's oxy- and deoxy-hemoglobin  
142 concentration were computed using the data from the remaining three wavelengths with  
143 mean  $R^2 > 0.95$ . Finally, for the included subjects and included wavelengths, individual  
144 FD-DOS timepoints with  $R^2 < 0.95$  for amplitude and/or phase for any of the light  
145 wavelengths were removed.

146

147 For DCS, datapoints were removed if the photon count rate for a given  $g_2(\rho, \tau)$  curve  
148 dropped below 10,000 counts per second. Entire subject measurements were removed if  
149 photon rates  $< 10,000$  counts per second were persistent, or if variation occurred in the  
150 quality of  $g_2(\tau)$  fits at early decay times, as this would indicate instability in the coherence  
151 parameter,  $\beta$ . This  $\beta$  parameter was fit for during a baseline period and subsequently held  
152 constant, leaving only blood flow index to be fit for the remainder of the dataset.

153

#### 154 *Rodent DC-Electrocorticography Recordings*

155 All procedures described below were approved by the Institutional Animal Care and Use  
156 Committee at the University of New Mexico in compliance with AAALAC guidelines. We  
157 measured DC electrophysiologic signals during ECT in  $n = 7$  male C57Bl/6J mice (10 -  
158 12 weeks of age,  $27.3 \pm 1.0$  g). Mice were anesthetized with isoflurane (3% induction,  
159 1.0-1.2 % maintenance, carrier gas  $O_2$  2L/min) and intermittently paralyzed with  
160 rocuronium (0.6 mg/kg i.p.) to eliminate muscle artifact. Prior to paralysis, mice were  
161 endotracheally intubated and mechanically ventilated (tidal volume 10 - 12 mL/kg,

162 respiratory rate 130 - 140 breaths/min, PEEP 5 cm H<sub>2</sub>O, peak pressure 15 cm H<sub>2</sub>O; Kent  
163 Physiosuite, Kent Scientific Corp, Torrington, CT). The scalp was incised and reflected to  
164 broadly expose the skull. Bifrontal burr holes were drilled (AP +1.5 mm, ML ±1.5 mm from  
165 Bregma), and glass capillary micropipettes (filled with 0.9% NaCl in continuity with  
166 Ag/AgCl electrodes) were stereotactically positioned 300 μm beneath the cortical surface.  
167 An Ag/AgCl ground electrode was placed in the subcutaneous tissues of the neck.  
168 Stimulus trains (12 square-wave pulses, 60 Hz, pulse width 0.2 - 0.5 ms) were generated  
169 by a rodent ECT unit (Model 57800, Ugo Basile, Gemonio, Italy) and delivered via  
170 auricular clip electrodes moistened with conductive gel. The pulse amplitude was titrated  
171 (10 - 99 mA) to identify seizure threshold, then supra-maximal stimuli were delivered up  
172 to 99 mA. Unfiltered raw signals were acquired with a DC amplifier (Neuroprobe Model  
173 1600, A-M Systems, Carlsborg, WA) and digitized and recorded at 20 kHz (Power Lab  
174 16/30 and LabChart 7.3.7, AD Instruments, Colorado Springs, CO). Signals were  
175 duplicated and digitally filtered off-line to analyze seizure activity (0.5 - 40 Hz band-pass  
176 filter) and DC shifts (2 Hz low-pass filter). Total power (0 - 500 Hz) was calculated using  
177 a Hann (cosine-bell) FFT of 1024 samples, window overlap 50%.

178

### 179 *Functional Near Infrared Spectroscopy Replication Case Series*

180 Patients included in this case series (n=3) were recruited from those already receiving  
181 ECT at University of New Mexico in 2016. Patients consented to have additional  
182 procedural monitoring using the INVOS device (Medtronic, NJ) – a commercially available  
183 clinical near-infrared spectroscopy (NIRS) system – to monitor oxygen saturation levels  
184 in the right and left hemispheres at the F1 and F2 positions. Note this commercial NIRS



185 system employed for the study is somewhat limited, because it uses a continuous light  
186 source. The FD-DOS system in our study modulates the light source intensity to obtain  
187 phase and amplitude data that enables separation of absorption and scattering, and  
188 thereby leads to more accurate quantification of tissue properties. No additional  
189 interventions or changes in patient care were introduced as part of these case series  
190 observations. The INVOS instrument's data were sampled at 0.2 Hz to provide continuous  
191 monitoring of cerebral oxygenation levels during ECT. Calibration was performed  
192 according to the manufacturer's guidelines to ensure accurate and reliable  
193 measurements. Data were manually timestamped for stimulation, seizure start, and  
194 seizure end time.

195

#### 196 *Direct Current Electroencephalography*

197 A subset of human ECT recordings implemented direct current electroencephalography  
198 (DC-EEG) using a portable amplifier (eego, ANT Neuro) combined with either a 24-  
199 channel saline net headcap (waveguard, ANT Neuro) with the Cz electrode placed at the  
200 skull vertex, or a custom-fabricated adaptor (ANT Neuro) with individual leads coupled to  
201 Ag/AgCl electrode cups (WBT-DSC, The Electrode Store) attached to the forehead  
202 overlying the bilateral prefrontal cortices using conductive adhesive (Tensive). EEG  
203 signals were collected unfiltered and analyzed offline in MatLab using open-source tools  
204 (EEGLAB)<sup>11</sup>.

205

206 **References:**

- 207 1. Hofmeijer, J., van Kaam, C. R., van de Werff, B., Vermeer, S. E., Tjepkema-Cloostermans, M.  
208 C. & van Putten, M. Detecting Cortical Spreading Depolarization with Full Band Scalp  
209 Electroencephalography: An Illusion? *Front Neurol* **9**, 17, (2018).
- 210 2. Riederer, F., Beiersdorf, J., Lang, C., Pirker-Kees, A., Klein, A., Scutelnic, A., Platho-  
211 Elwischger, K., Baumgartner, C., Dreier, J. P. & Schankin, C. Signatures of migraine  
212 aura in high-density-EEG. *Clin Neurophysiol* **160**, 113-120, (2024).
- 213 3. Forti, R. M. *et al.* Non-invasive diffuse optical monitoring of cerebral physiology in an adult  
214 swine-model of impact traumatic brain injury. *Biomed Opt Express* **14**, 2432-2448,  
215 (2023).
- 216 4. Carp, S. A., Farzam, P., Redes, N., Hueber, D. M. & Franceschini, M. A. Combined multi-  
217 distance frequency domain and diffuse correlation spectroscopy system with  
218 simultaneous data acquisition and real-time analysis. *Biomed Opt Express* **8**, 3993-4006,  
219 (2017).
- 220 5. *American National Standard for safe use of lasers (ANSI 136.1)*. (The Laser Institute of  
221 America).
- 222 6. Durduran, T., Choe, R., Baker, W. B. & Yodh, A. G. Diffuse Optics for Tissue Monitoring  
223 and Tomography. *Rep Prog Phys* **73**, (2010).
- 224 7. Carp, S. A., Robinson, M. B. & Franceschini, M. A. Diffuse correlation spectroscopy: current  
225 status and future outlook. *Neurophotonics* **10**, 013509, (2023).
- 226 8. Hebden, J. C., Forrester, G., Zhang, H. & Pacis, D. M. Using spectral derivatives to remove  
227 the influence of hair on optical images of the static absorbing properties of tissue-like  
228 turbid media. *Neurophotonics* **11**, 025002, (2024).
- 229 9. Fantini, S., Franceschini, M. A., Fishkin, J. B., Barbieri, B. & Gratton, E. Quantitative  
230 determination of the absorption spectra of chromophores in strongly scattering media: a  
231 light-emitting-diode based technique. *Appl Opt* **33**, 5204-5213, (1994).
- 232 10. Boas, D. A. & Yodh, A. G. Spatially varying dynamical properties of turbid media probed  
233 with diffusing temporal light correlation. *Journal of the Optical Society of America A* **14**,  
234 (1997).
- 235 11. Delorme, A. & Makeig, S. EEGLAB: an open source toolbox for analysis of single-trial EEG  
236 dynamics including independent component analysis. *J Neurosci Methods* **134**, 9-21,  
237 (2004).
- 238
